# Supplementary material for: Compositional properties characterizing commonly transported oils and controlling their fate in the marine environment
Source: Royal Society of Chemistry journal article supplement (doi:10.1039/c2em30385j), 2012-01-01
Supplement: c2em30385j.pdf [file c2em30385j.pdf]

Table SI-1. Oil fingerprinting compounds, m/z used for peak quantitation and calculated normative diagnostic ratios according with CEN/TR 15522.

| Compound name                                 | Abbrev        | m/z | Diagnostic ratios |
|-----------------------------------------------|---------------|-----|-------------------|
| n-heptadecane                                 | C17           | 85  | C17/pris          |
| pristane                                      | Pris          | 85  | C18/phy           |
| n-octadecane                                  | C18           | 85  | pris/phy          |
| phytane                                       | Phy           | 85  | 4-MD/1-MD         |
| 4-methyldibenzothiophene                      | 4-MD          | 198 | 2-MP/1-MP         |
| 1-methyldibenzothiophene                      | 1-MD          | 198 | 2-MF/4-Mpy        |
| 2-methylphenanthrene                          | 2-MP          | 192 | B(a)F/4-Mpy       |
| 1-methylphenanthrene                          | 1-MP          | 192 | B(b+c)F/4-Mpy     |
| 2-methylfluoranthene                          | 2-MF          | 216 | 2-Mpy/4-Mpy       |
| Benzo[a]fluorene                              | B(a)F         | 216 | 1-Mpy/4-Mpy       |
| retene                                        | Retene        | 234 | Retene/ T-M-phen  |
| Benzo[b+c]fluorene                            | B(b+c)F       | 216 | BNT/T-M-phen      |
| 2-methylpyrene                                | 2-Mpy         | 216 | 27Ts/30ab         |
| 4-methylpyrene                                | 4-Mpy         | 216 | 27Tm/30ab         |
| 1-methylpyrene                                | 1-Mpy         | 216 | 28ab/30ab         |
| tetramethyl-phenanthrene                      | T-M-phen      | 234 | 29ab/30ab         |
| benzo[b]naphtho[1,2-d]thiophene               | BNT           | 234 | 30O/30ab          |
| 13β (H),17α(H),20S-cholestane (diasterane)    | 27dbS         | 217 | 31abS/30ab        |
| 13β (H),17α(H),20R-cholestane (diasterane)    | 27dbR         | 217 | 30G/30ab          |
| 5α (H),14β(H),17β(H),20(R+S)-cholestane       | 27bbR+S       | 218 | 27dbR/27dbS       |
| 18α(H)-22,29,30-trisnorhopane                 | 27-TS         | 191 | 27bb/29bb         |
| C26,20S-triaromatic sterane                   | SC26TA        | 231 | SC26/ RC26+SC27   |
| 17α(H)-22,29,30-trisnorhopane                 | 27-TM         | 191 | SC28/RC26 + SC27  |
| C26,20R+C27,20S-triaromatic steranes          | RC26TA+SC27TA | 231 | RC27/RC26+ SC27   |
| 24-ethyl-5α(H),14β (H),17β,20(R+S)-cholestane | 29bbR+S       | 218 | RC28/RC26+SC27    |
| 17α(H),21β(H)-28,30-bisnorhopane              | 28ab          | 191 |                   |
| C28,20S-triaromatic sterane                   | SC28TA        | 231 |                   |
| 17α(H),21β(H)-30-norhopane                    | 29ab          | 191 |                   |
| C27,20R-triaromatic sterane                   | RC27TA        | 231 |                   |
| 18α(H)-oleanane                               | 30O           | 191 |                   |
| 17α(H),21β(H)-hopane                          | 30ab          | 191 |                   |
| C28,20R-triaromatic sterane                   | RC28TA        | 231 |                   |
| 17α(H),21β(H),22S-homohopane                  | 31abS         | 191 |                   |
| Gammacerane                                   | 30G           | 191 |                   |

Table SI.2. Diagnostic ratios of the investigated oils

|    | Diagnostic ratios | Azeri | Dalia | Flota | Forcados | Diesel A | Diesel B | Diesel C | HFO  | Hungo | Kiriuk | Maya | Murban | Nemba | Norre | North Sea oil | Oseberg | Shearwater light | Sitica | Sorosh |
|----|-------------------|-------|-------|-------|----------|----------|----------|----------|------|-------|--------|------|--------|-------|-------|---------------|---------|------------------|--------|--------|
| 1  | C17/Inis          | 6.24  | 0.17  | 2.67  | 1.15     | 1.48     | 1.19     | 1.21     | 5.15 | 1.51  | 5.42   | 4.38 | 2.85   | 1.10  | 1.12  | 2.63          | 1.13    | 1.62             | 1.97   | 1.32   |
| 2  | C18/Phy           | 3.05  | 0.08  | 1.88  | 2.84     | 1.54     | 1.14     | 1.23     | 3.45 | 1.32  | 4.30   | 2.72 | 1.90   | 1.10  | 1.22  | 2.77          | 1.28    | 1.57             | 2.30   | 1.09   |
| 3  | Prisiphy          | 0.51  | 0.86  | 0.75  | 2.71     | 1.09     | 0.86     | 1.02     | 0.88 | 1.31  | 0.89   | 0.75 | 0.69   | 1.05  | 1.11  | 1.14          | 1.16    | 1.03             | 1.28   | 0.87   |
| 4  | 4-MDPI-MD         | 1.78  | 2.77  | 1.79  | 2.70     | 0.00     | 2.50     | 5.84     | 1.61 | 2.00  | 3.54   | 1.95 | 2.59   | 2.33  | 3.70  | 3.64          | 2.86    | 1.96             | 1.68   | 1.57   |
| 5  | 2-MIP1-MIP        | 0.93  | 0.86  | 1.20  | 1.19     | 1.74     | 1.78     | 1.62     | 1.25 | 0.86  | 1.56   | 1.07 | 0.94   | 1.19  | 1.25  | 0.89          | 0.89    | 0.71             | 0.87   | 0.93   |
| 6  | 2-MIF4-MIP        | 0.00  | 0.13  | 0.21  | 0.64     | 0.00     | 0.08     | 0.24     | 0.34 | 0.00  | 0.00   | 0.00 | 0.00   | 0.15  | 0.55  | 0.24          | 0.45    | 0.39             | 0.16   | 0.21   |
| 7  | Blc-c/F4-MIP      | 0.34  | 1.21  | 1.70  | 2.86     | 0.00     | 0.18     | 0.47     | 1.49 | 1.22  | 0.38   | 0.53 | 0.41   | 0.91  | 2.40  | 0.89          | 2.63    | 2.04             | 0.71   | 1.15   |
| 8  | 1-MIPy4-MIP       | 0.13  | 0.28  | 0.54  | 0.80     | 0.00     | 0.07     | 0.17     | 0.85 | 0.27  | 0.38   | 0.16 | 0.13   | 0.26  | 0.61  | 0.25          | 0.61    | 0.52             | 0.24   | 0.38   |
| 9  | 2-MIPy4-MIP       | 0.21  | 0.40  | 0.43  | 0.35     | 0.49     | 0.97     | 1.02     | 0.81 | 0.36  | 0.33   | 0.25 | 0.27   | 0.46  | 0.45  | 0.47          | 0.52    | 0.39             | 0.45   | 0.36   |
| 10 | Blc-c/F4-MIP      | 0.52  | 0.48  | 0.58  | 0.59     | 0.66     | 0.71     | 0.63     | 0.96 | 0.75  | 0.64   | 0.57 | 0.54   | 0.62  | 0.51  | 0.66          | 0.64    | 0.66             | 0.54   | 0.67   |
| 11 | Retene/T-M-phen   | 0.00  | 0.00  | 2.43  | 0.00     | 0.00     | 0.00     | 0.00     | 0.00 | 0.00  | 0.00   | 0.00 | 0.00   | 0.00  | 4.23  | 0.00          | 5.78    | 2.66             | 0.00   | 1.29   |
| 12 | BNTT-M-phen       | 1.33  | 0.30  | 0.45  | 2.07     | 0.15     | 0.00     | 0.14     | 1.77 | 0.19  | 1.80   | 1.29 | 2.04   | 0.39  | 0.65  | 0.24          | 0.93    | 0.92             | 0.18   | 0.89   |
| 13 | 27Ts/30ab         | 0.30  | 0.16  | 0.17  | 0.17     | 0.00     | 0.70     | 0.00     | 0.16 | 0.10  | 0.13   | 0.12 | 0.76   | 0.13  | 0.16  | 0.55          | 0.18    | 0.16             | 0.19   | 0.07   |
| 14 | 27Tm/30ab         | 0.27  | 0.14  | 0.20  | 0.21     | 0.00     | 0.59     | 0.00     | 0.58 | 0.16  | 0.43   | 0.33 | 0.29   | 0.16  | 0.16  | 0.22          | 0.15    | 0.16             | 0.20   | 0.33   |
| 15 | 28ab/30ab         | 0.00  | 0.10  | 0.48  | 0.11     | 0.00     | 0.00     | 0.00     | 0.00 | 0.00  | 0.00   | 0.00 | 0.00   | 0.07  | 0.10  | 0.00          | 0.22    | 0.00             | 0.00   | 0.00   |
| 16 | 29ab/30ab         | 1.17  | 0.42  | 0.50  | 0.59     | 0.00     | 1.42     | 0.00     | 0.91 | 0.39  | 1.30   | 1.03 | 0.81   | 0.52  | 0.52  | 0.48          | 0.42    | 0.48             | 0.52   | 1.20   |
| 17 | 30U/30ab          | 0.00  | 0.06  | 0.05  | 0.89     | 0.00     | 0.00     | 0.00     | 0.00 | 0.00  | 0.00   | 0.00 | 0.00   | 0.18  | 0.00  | 0.00          | 0.00    | 0.00             | 0.00   | 0.00   |
| 18 | 31abS/30ab        | 0.71  | 0.33  | 0.33  | 0.65     | 0.24     | 0.00     | 0.00     | 0.41 | 0.43  | 0.53   | 0.73 | 0.56   | 0.30  | 0.34  | 0.55          | 0.38    | 0.51             | 0.39   | 0.55   |
| 19 | 30G/30ab          | 0.18  | 0.07  | 0.12  | 0.11     | 0.06     | 0.00     | 0.00     | 0.00 | 0.10  | 0.15   | 0.00 | 0.15   | 0.14  | 0.08  | 0.00          | 0.08    | 0.08             | 0.12   | 0.11   |
| 20 | 27bbS/27qbs       | 0.00  | 0.68  | 0.52  | 0.61     | 0.00     | 0.62     | 0.57     | 0.00 | 0.64  | 0.00   | 0.63 | 0.70   | 0.64  | 0.62  | 0.64          | 0.62    | 0.59             | 0.69   | 0.53   |
| 21 | 27bb/29bb         | 0.63  | 0.78  | 1.02  | 0.62     | 0.00     | 2.37     | 0.00     | 1.09 | 1.21  | 0.83   | 0.83 | 0.73   | 1.01  | 0.85  | 0.84          | 1.05    | 1.24             | 1.20   | 0.87   |
| 22 | SG26/RC26+SC27    | 0.00  | 0.31  | 0.34  | 0.21     | 0.34     | 0.00     | 0.35     | 0.00 | 0.35  | 0.20   | 0.18 | 0.00   | 0.32  | 0.26  | 0.36          | 0.35    | 0.24             | 0.23   | 0.21   |
| 23 | SG28/RC26+SC27    | 0.85  | 0.49  | 0.63  | 0.45     | 0.74     | 0.00     | 0.34     | 0.67 | 0.00  | 0.53   | 0.59 | 0.80   | 0.57  | 0.71  | 0.63          | 0.58    | 0.48             | 0.47   | 0.63   |
| 24 | RC27/RC26+SC27    | 0.64  | 0.52  | 0.49  | 0.58     | 0.54     | 0.00     | 0.34     | 0.42 | 0.00  | 0.50   | 0.62 | 0.77   | 0.55  | 0.57  | 0.46          | 0.50    | 0.51             | 0.54   | 0.57   |
| 25 | RC28/RC26+SC27    | 0.97  | 0.46  | 0.59  | 0.47     | 0.63     | 0.00     | 0.45     | 0.00 | 0.54  | 0.58   | 0.60 | 0.85   | 0.55  | 0.63  | 0.51          | 0.54    | 0.47             | 0.44   | 0.64   |
